# Supplementary material for: Blood-Based Non-Invasive Tests of Hepatic Fibrosis in Autoimmune Hepatitis: Application among Selected Patients Leads to Higher Accuracy
Source: MDPI journal article supplement (doi:10.3390/gastroent13030029), 2022-09-09
Supplement: s1 [file s1]

# Blood-based Non-invasive Tests of Hepatic Fibrosis in Autoimmune Hepatitis: Application Among Selected Patients Leads to Higher Accuracy

Marco Ferronato<sup>1,\*</sup>, Marco Lenzi<sup>1</sup>, Paolo Muratori<sup>2</sup> and Luigi Muratori<sup>1</sup>

## Supplementary material

**Table S1. Comparison of collected data and derived non-invasive tests of fibrosis among acute and non-acute AIH patients.**

|                | Missing | Acute                   | Non-acute              | p-Value |
|----------------|---------|-------------------------|------------------------|---------|
| Age            | 0       | 49,00 (35,00-57,50)     | 52,00 (33,50-58,50)    | 0,755   |
| WBC            | 16      | 6,20 (5,30-7,79)        | 5,46 (4,60-6,64)       | 0,048   |
| N              | 20      | 3,35 (2,74-4,19)        | 2,77 (2,19-3,80)       | 0,023   |
| L              | 20      | 2,00 (1,57-2,80)        | 1,90 (1,44-2,40)       | 0,317   |
| RBC            | 18      | 4,54 (4,25-4,85)        | 4,66 (4,25-4,88)       | 0,444   |
| Hb             | 16      | 13,10 (12,40-14,30)     | 13,50 (12,90-14,50)    | 0,185   |
| MCV            | 21      | 89,80 (85,50-92,00)     | 87,90 (83,75-91,65)    | 0,367   |
| Plt            | 17      | 223,50 (176,25-289,25)  | 225,00 (170,00-265,00) | 0,4     |
| RDW            | 40      | 14,90 (13,80-16,30)     | 13,60 (13,20-14,00)    | <0,001  |
| MPV            | 46      | 10,10 (8,90-11,25)      | 8,90 (8,10-10,20)      | 0,029   |
| AST            | 2       | 746,50 (366,00-1120,00) | 136,50 (54,75-295,25)  | <0,001  |
| AST/ULN        | 2       | 18,00 (8,90-30,00)      | 3,90 (1,70-8,00)       | <0,001  |
| ALT            | 2       | 944,50 (553,00-1452,25) | 204,00 (64,25-315,00)  | <0,001  |
| ALT/ULN        | 2       | 25,00 (14,25-34,45)     | 5,30 (1,70-8,95)       | <0,001  |
| GGT            | 9       | 115,00 (68,50-193,00)   | 40,50 (28,25-134,50)   | <0,001  |
| ALP            | 14      | 153,00 (97,00-217,00)   | 132,50 (79,75-240,50)  | 0,332   |
| ALB            | 14      | 38,00 (31,00-41,85)     | 40,00 (37,90-41,85)    | 0,036   |
| SD             | 21      | 11,20 (10,00-13,10)     | 12,00 (10,13-13,78)    | 0,261   |
| FIB-4          | 17      | 4,03 (2,36-7,20)        | 1,78 (1,12-3,48)       | <0,001  |
| APRI           | 18      | 7,81 (3,99-12,47)       | 1,62 (0,76-3,42)       | <0,001  |
| AAR            | 2       | 0,72 (0,54-1,00)        | 0,73 (0,63-0,93)       | 0,821   |
| RDW/PC         | 40      | 0,07 (0,06-0,09)        | 0,06 (0,05-0,08)       | 0,226   |
| SD/PC          | 29      | 0,05 (0,04-0,07)        | 0,05 (0,04-0,07)       | 0,273   |
| Ishak $\geq 4$ | 0       | 13 (24%)                | 11 (22 %)              | 0,886   |

AAR = AST to ALT ratio; ALP = Alkaline phosphatase; ALT = alanine aminotransferase; APRI = AST to platelet count ratio; AST = aspartate aminotransferase; FIB-4 = fibrosis 4 score; GGT = gamma-glutamyl transpeptidase; Hb = hemoglobin; MCV = mean corpuscular volume; MPV = mean platelet volume; PC = platelets count; RBC = red blood cells; RDW = red blood cell volume distribution width; RDW/PC = red blood cell volume distribution width to platelet count ratio; SD = spleen diameter (SD); SD/PC = spleen diameter to platelet count ratio; ULN = upper limit of norm; WBC = white blood cells
